# Supplementary material
Source: PubMed Central journal article supplement (PMC5144740)
Supplement: NIHMS831781-supplement-Supplemental_Figure_1.pdf [file NIHMS831781-supplement-Supplemental_Figure_1.pdf]

## SUPPLEMENTAL FIGURE 1:

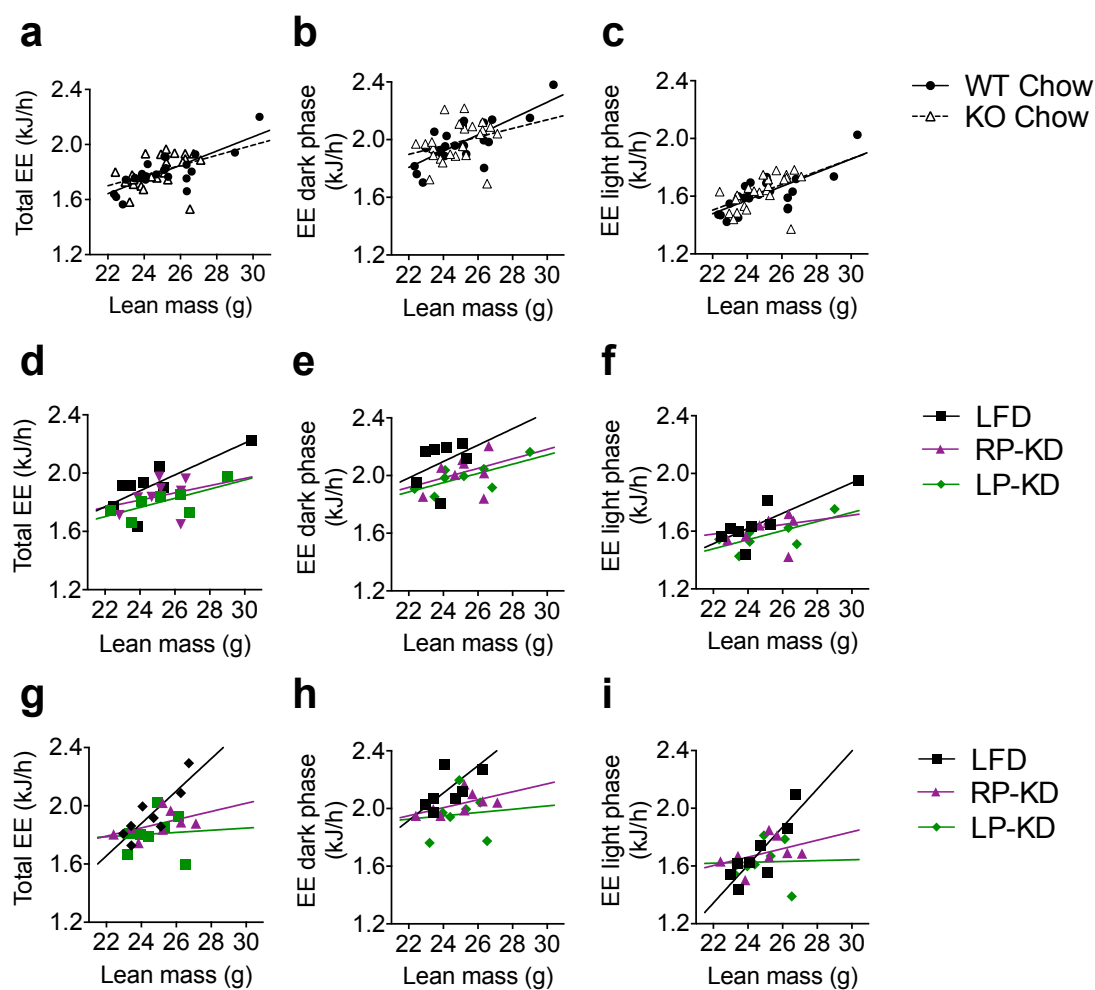

**Energy expenditure (EE) in *Fgf21* WT and KO mice in response to different diets.**

(a-c) Correlation plots between lean mass and (a) total EE, (b) dark phase EE or (c) light phase EE in chow-fed *Fgf21* wild type and knock out mice. (d-f) Correlation plots between lean mass and (d) total EE, (e) dark phase EE or (f) light phase EE in *Fgf21* WT mice fed for three days with RP-KD, LP-KD or control diet (LFD). (g-h) Correlation plots between lean mass and (g) total EE, (h) dark phase EE, (i) light phase EE in *Fgf21* KO mice fed for three days with LFD, RP-KD or LP-KD, respectively. N = 8 samples per group. All analyses were performed using Prism 6.0 (GraphPad, Inc, La Jolla, CA) or SPSS 20 (IBM, Armonk, NY).
