# Supplementary material
Source: PubMed Central journal article supplement (PMC5144740)
Supplement: NIHMS831781-supplement-Supplemental_Figure_2.pdf [file NIHMS831781-supplement-Supplemental_Figure_2.pdf]

**SUPPLEMENTAL FIGURE 2:**

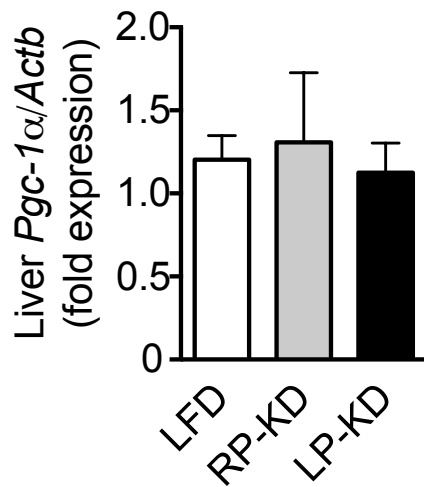

**Hepatic PGC1 $\alpha$  in mice fed for 8 weeks with LFD, RP-KD or LP-KD.**

Eight weeks of feeding with either RP-KD or LP-KD diet did not result in an up-regulation of peroxisome proliferator-activated receptor-gamma co-activator alpha (*Pgc1 $\alpha$* ). All data are shown as mean  $\pm$  SEM, N = 7 - 14 random samples per group. Statistical significance was analyzed by One Way ANOVA followed by Tukey's post hoc tests. Analyses were performed by using GraphPad Prism 6.0 (GraphPad, Inc, La Jolla, CA).
