# Supplementary material
Source: PubMed Central journal article supplement (PMC5144740)
Supplement: NIHMS831781-supplement-Supplemental_Figure_3.pdf [file NIHMS831781-supplement-Supplemental_Figure_3.pdf]

**SUPPLEMENTAL FIGURE 3:**

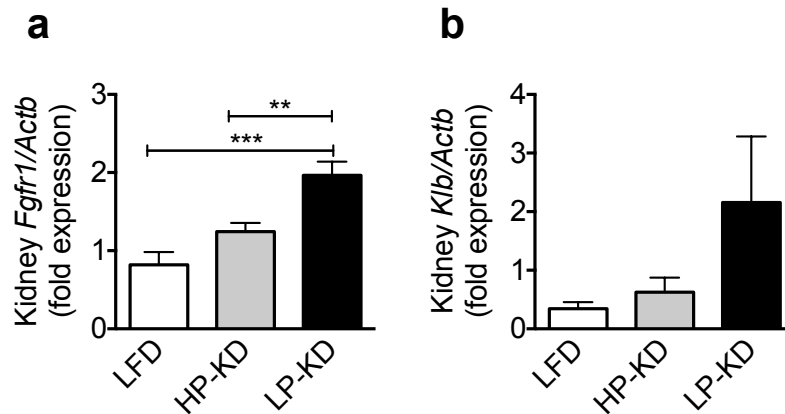

**Renal expression of the *Fgf21* receptor complex *Fgfr1* and *Klb* following 8 weeks of KD feeding.**

Eight weeks of feeding with LP-KD diet resulted in a significant up-regulation of (a) fibroblast growth factor receptor 1 (*Fgfr1*) and in a trend towards an increased  $\beta$ -klotho (*Klb*) expression in the isolated kidney cortex (b). All data are shown as means  $\pm$  SEM, N = 7 - 14 random samples per group. Statistical significance was analyzed by One Way ANOVA followed by Tukey's post hoc tests. P < 0.01 (\*\*), P < 0.001 (\*\*\*). Analyses were performed by using GraphPad Prism 6.0 (GraphPad, Inc, La Jolla, CA).
