# Supplementary material
Source: PubMed Central journal article supplement (PMC5144740)
Supplement: NIHMS831781-supplement-Supplemental_Table_1.pdf [file NIHMS831781-supplement-Supplemental_Table_1.pdf]

**SUPPLEMENTAL TABLE 1:**

Diet composition (Research Diets, New Brunswick, NJ).

| Product #           | LFD           |             | RP-KD         |             | LP-KD         |             |
|---------------------|---------------|-------------|---------------|-------------|---------------|-------------|
|                     | #D10053101    |             | #D10060602    |             | #D10060601    |             |
|                     | gm            | kcal        | gm            | kcal        | gm            | kcal        |
| Protein             | 13.4          | 13          | 21.6          | 13          | 8,9           | 5           |
| Carbohydrate        | 72.4          | 77          | 0             | 0           | 0             | 0           |
| Fat                 | 4.0           | 10          | 61.5          | 87          | 72.8          | 95          |
| Total               | 89.8          | 100         | 83.1          | 100         | 81.7          | 100         |
| kcal/gm             | 3.77          |             | 6.36          |             | 6.89          |             |
| <b>Ingredients</b>  | <b>gm</b>     | <b>kcal</b> | <b>gm</b>     | <b>kcal</b> | <b>gm</b>     | <b>kcal</b> |
| Casein , 30 Mesh    | 70            | 252         | 82.6          | 297         | 31.0          | 112         |
| L-Cystine           | 2             | 8           | 3.1           | 12          | 1.2           | 5           |
| Isoleucine          | 3             | 12          | 3.2           | 13          | 1.2           | 5           |
| Leucine             | 5.4           | 22          | 5.8           | 23          | 2.2           | 9           |
| Lysine              | 4.6           | 18          | 4.9           | 20          | 1.9           | 8           |
| Methionine          | 1.6           | 6           | 1.7           | 7           | 0.7           | 3           |
| Phenylalanine       | 3.1           | 12          | 3.3           | 13          | 1.3           | 5           |
| Threonine           | 2.3           | 9           | 2.5           | 10          | 1             | 4           |
| Tryptophan          | 0.7           | 3           | 0,8           | 3           | 0.3           | 1           |
| Valine              | 3.5           | 14          | 3.8           | 15          | 1.5           | 6           |
| Histidine           | 1.6           | 6           | 1.7           | 7           | 0.7           | 3           |
| Alanine             | 1.6           | 6           | 1.7           | 7           | 0.7           | 3           |
| Arginine            | 2.2           | 9           | 2.4           | 10          | 0.9           | 4           |
| Aspartic Acid       | 4             | 16          | 4.3           | 17          | 1.7           | 7           |
| Glutamic Acid       | 12.9          | 52          | 13.9          | 56          | 5.3           | 21          |
| Glycine             | 1.1           | 4           | 1.2           | 5           | 0.5           | 2           |
| Proline             | 7.2           | 29          | 7.7           | 31          | 3             | 12          |
| Serine              | 3.3           | 13          | 3.6           | 14          | 1.4           | 6           |
| Tyrosine            | 3.3           | 13          | 3.5           | 14          | 1.3           | 5           |
| Corn Starch         | 485.7         | 1943        | 0             | 0           | 0             | 0           |
| Maltodextrin 10     | 125           | 500         | 0             | 0           | 0             | 0           |
| Sucrose             | 100           | 400         | 0             | 0           | 0             | 0           |
| Cellulose, BW200    | 50            | 0           | 58.6          | 0           | 58.6          | 0           |
| Butter anhydrous    | 30            | 270         | 423           | 3807        | 462.5         | 4163        |
| Soybean oil         | 10            | 90          | 10            | 90          | 10            | 90          |
| Mineral Mix S10022G | 35.0          | 0           | 41            | 0           | 41            | 0           |
| Mineral Mix S10022M | 10            | 0           | 11.7          | 0           | 11.7          | 0           |
| Sodium Bicarbonate  | 3.5           | 0           | 3.5           | 0           | 3.5           | 0           |
| Vitamin Mix V10037  | 10            | 40          | 0             | 0           | 0             | 0           |
| Vitamin Mix V10037C | 0             | 0           | 1.17          | 5           | 1.17          | 5           |
| Choline Bitartrate  | 2.5           | 0           | 2.9           | 0           | 2.9           | 0           |
| FD&C Yellow Dye #5  | 0.05          | 0           | 0             | 0           | 0.05          | 0           |
| FD&C Blue Dye #1    | 0             | 0           | 0.05          | 0           | 0             | 0           |
| <b>Total</b>        | <b>995.15</b> | <b>3748</b> | <b>703.62</b> | <b>4475</b> | <b>649.22</b> | <b>4476</b> |
