# Supplementary material
Source: PubMed Central journal article supplement (PMC5144740)
Supplement: NIHMS831781-supplement-Supplemental_Table_2.pdf [file NIHMS831781-supplement-Supplemental_Table_2.pdf]

**SUPPLEMENTAL TABLE 2:**

Murine TaqMan probes (Applied Biosystems, Foster City, CA) for quantitative gene expression analyses using the ABI Prism 7900HT Sequence Detection System.

| <b>Gene name</b>                                                    | <b>Short name</b> | <b>TaqMan Probe</b> |
|---------------------------------------------------------------------|-------------------|---------------------|
| Fibroblast growth factor 21 (murine)                                | <i>Fgf21</i>      | Mm00840165_g1       |
| Fibroblast growth factor 21 (human)                                 | <i>FGF21</i>      | Hs00173927_m1       |
| Fibroblast growth factor receptor 1                                 | <i>Fgfr1</i>      | Mm00438930_m1       |
| Peroxisome proliferator-activated receptor-gamma co-activator alpha | <i>Pgc1a</i>      | Mm01208835_m1       |
| $\beta$ -klotho                                                     | <i>Klb</i>        | Mm00473122_m1       |
| Atrogin-1                                                           | <i>Fbxo32</i>     | Mm00499523_m1       |
| Muscle RING-finger protein-1                                        | <i>Murf1</i>      | Mm01185221_m1       |
| 3-hydroxybutyrate dehydrogenase, type 1                             | <i>Bdh1</i>       | Mm00558330_m1       |
| 3-hydroxybutyrate dehydrogenase, type 2                             | <i>Bdh2</i>       | Mm00459075_m1       |
| Phosphoenolpyruvate carboxykinase                                   | <i>Pck1</i>       | Mm01247058_m1       |
| Glucose-6-phosphatase, catalytic                                    | <i>G6pc</i>       | Mm00839363_m1       |
| $\beta$ -actin (murine)                                             | <i>Actb</i>       | Mm00607939_s1       |
| $\beta$ -actin (human)                                              | <i>ACTB</i>       | Hs01060665_g1       |
| Phosphoglycerate kinase 1                                           | <i>Pgk1</i>       | Mm00435617_m1       |
