# Supplementary material
Source: PubMed Central journal article supplement (PMC5144740)
Supplement: NIHMS831781-supplement-Supplemental_Table_3.pdf [file NIHMS831781-supplement-Supplemental_Table_3.pdf]

**SUPPLEMENTAL TABLE 3:**

Univariate Analysis of Variance (ANCOVA) with body fat and lean mass as covariates to test for differences in total, light and dark phase energy expenditure (EE) between chow-fed WT and *Fgf21* KO mice. Significant changes are shown in bold. Energy expenditure data are derived from 8 mice per group and genotype. All analyses were performed using Prism 6.0 (GraphPad, Inc, La Jolla, CA) or SPSS 20 (IBM, Armonk, NY).

|           | EE total |                   | EE light phase |                   | EE dark phase |                   |
|-----------|----------|-------------------|----------------|-------------------|---------------|-------------------|
|           | F        | p-value           | F              | p-value           | F             | <b>p-value</b>    |
| Genotype  | 0.305    | 0.583             | 0.324          | 0.572             | 0.229         | 0.635             |
| Fat mass  | 0.060    | 0.808             | 0.638          | 0.429             | 0.034         | 0.855             |
| Lean mass | 30.885   | <b>&lt; 0.001</b> | 33.450         | <b>&lt; 0.001</b> | 21.707        | <b>&lt; 0.001</b> |
